# Supplementary material for: Replacing Di(2-ethylhexyl) Terephthalate by Di(2-ethylhexyl) 2,5-Furandicarboxylate for PVC Plasticization: Synthesis, Materials Preparation and Characterization
Source: MDPI journal article supplement (doi:10.3390/ma12142336), 2019-07-23
Supplement: s1 [file s1]

# Supplementary Materials: Replacing Di(2-ethylhexyl) Terephthalate by Di(2-ethylhexyl) 2,5-Furandicarboxylate for PVC Plasticization: Synthesis, Materials Preparation and Characterization

Marina Matos <sup>1</sup>, Rosemeyre A. Cordeiro <sup>2</sup>, Henrique Faneca <sup>2</sup>, Jorge F.J. Coelho <sup>3</sup>, Armando J.D. Silvestre <sup>1</sup> and Andreia F. Sousa <sup>1,\*</sup>

<sup>1</sup> CICECO-Aveiro Institute of Materials and Department of Chemistry, University of Aveiro, 3810-193 Aveiro, Portugal

<sup>2</sup> Center for Neuroscience and Cell Biology, University of Coimbra, 3004-504 Coimbra, Portugal

<sup>3</sup> CEMMPRE, Department of Chemical Engineering, University of Coimbra, 3030-790 Coimbra, Portugal

\* Correspondence: andreiafs@ua.pt; Tel.: +351-234-401-470

Received: 31 May 2019; Accepted: 19 July 2019; Published: 23 July 2019

## 1. Structural Characterization

**Table S1.** Chemical characteristics of the different plasticizers.

| Plasticizers | Molecular Formula                              | Molecular Weight | Viscosity <sup>a</sup> (cP; at 25 °C) | Density (g cm <sup>-3</sup> ) |
|--------------|------------------------------------------------|------------------|---------------------------------------|-------------------------------|
| DEHF         | C <sub>22</sub> H <sub>36</sub> O <sub>5</sub> | 380.53           | 55                                    | 0.98                          |
| DEHT         | C <sub>24</sub> H <sub>38</sub> O <sub>4</sub> | 390.56           | 63                                    | 0.98                          |

<sup>a</sup> The relative uncertainty of the dynamic viscosity is  $\pm 0.35\%$ .

### 1.1. ATR FTIR Results

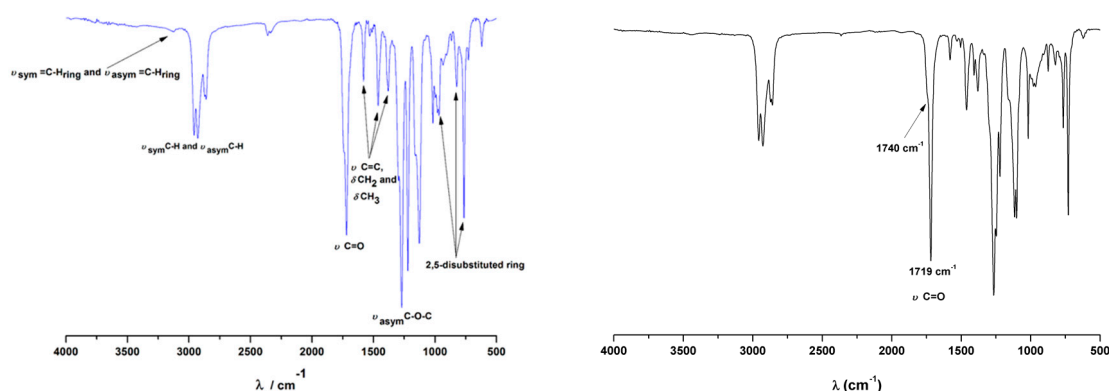

**Figure S1.** ATR FTIR spectra of DEHF plasticizer (left) and of DEHF/DEHT (20/35 phr/phr) mixture of plasticizers (right).

## 1.2. NMR Results

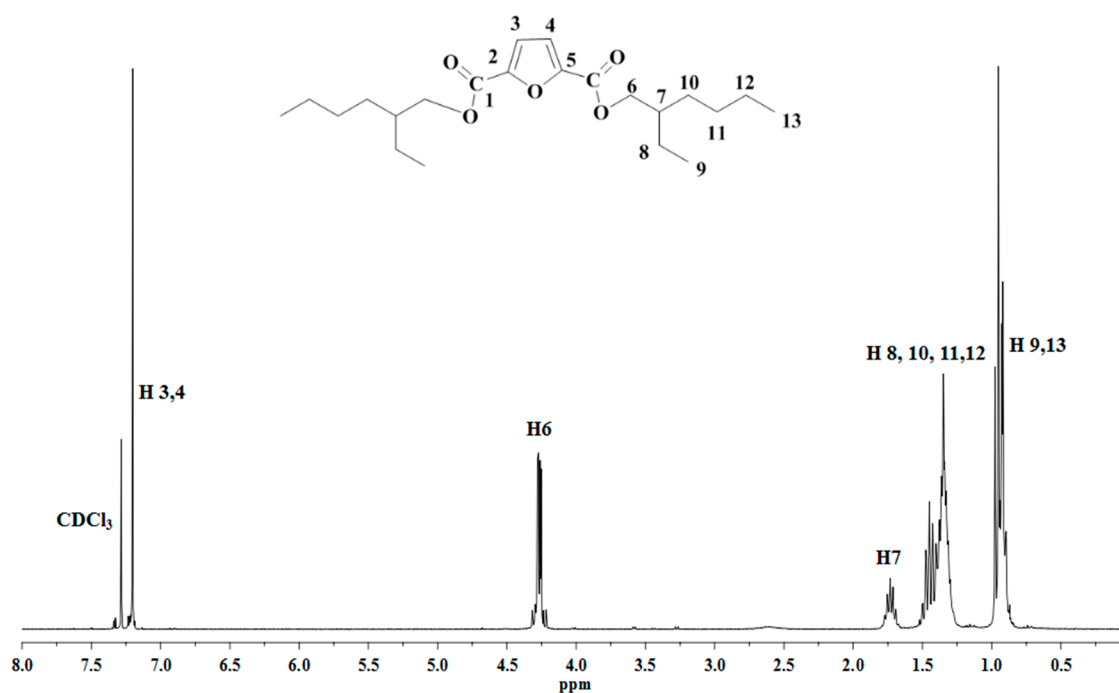

Figure S2.  $^1\text{H}$  NMR spectrum of DEHF (CDCl<sub>3</sub>).

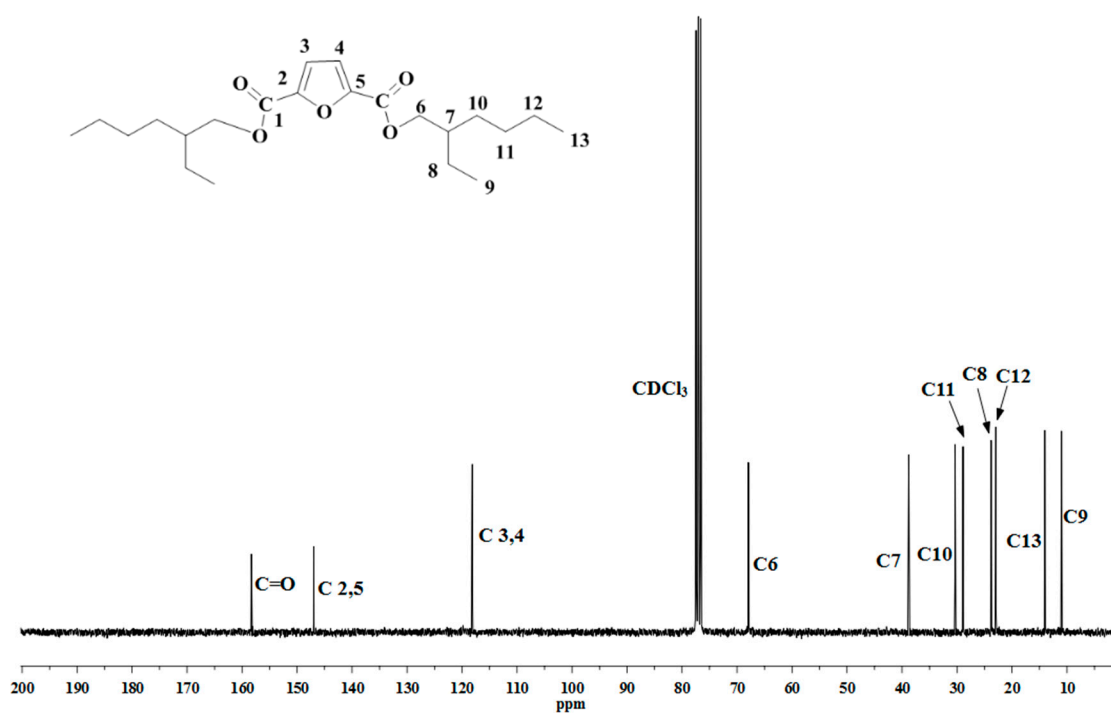

Figure S3.  $^{13}\text{C}$  NMR spectrum of DEHF (CDCl<sub>3</sub>).

### 1.3. GC-MS Results

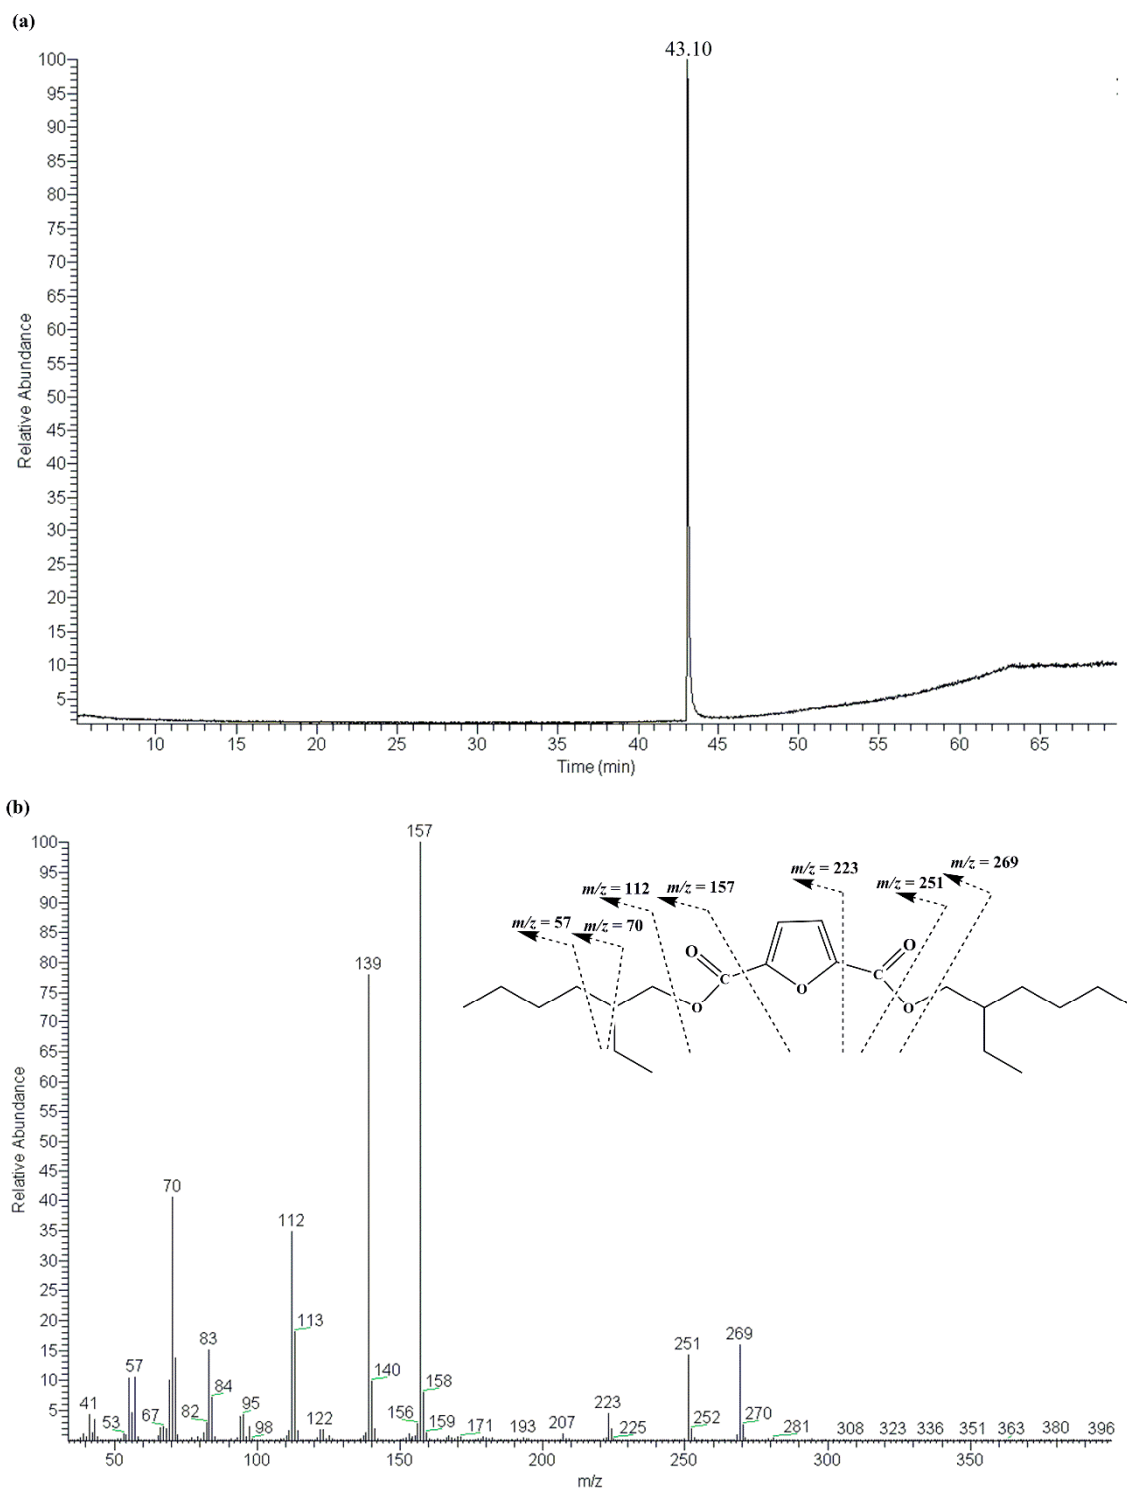

**Figure S4.** Main results from GC-MS analysis (a) GC chromatogram and (b) MS spectra of DEHF.

## 2. Mechanical Properties

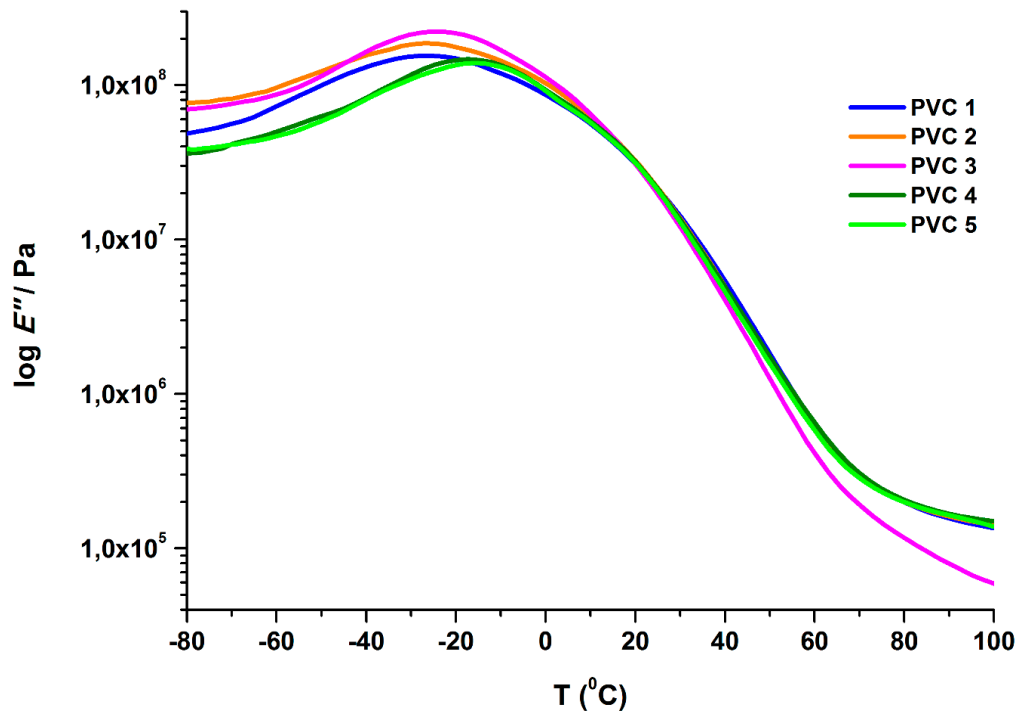

**Figure S5.**  $E''$  traces of all PVC films.

**Table S2.** Glass transition ( $T_g$ ) and storage modulus ( $E'$ ) at  $-10^\circ\text{C}$  and  $25^\circ\text{C}$  of all PVC-DEHF/DEHT blends.

| Formulations | $T_g$ ( $^\circ\text{C}$ ) | $E'$ (MPa)                 |          |                           |
|--------------|----------------------------|----------------------------|----------|---------------------------|
|              |                            | at $T_{-10^\circ\text{C}}$ | at $T_g$ | at $T_{25^\circ\text{C}}$ |
| Pure PVC     | 97.4 <sup>a</sup>          | -                          | -        | -                         |
| PVC 1        | 23.5                       | 551.8                      | 50.6     | 42.9                      |
| PVC 2        | 22.1                       | 658.2                      | 56.9     | 42.2                      |
| PVC 3        | 20.4                       | 694.7                      | 58.5     | 38.2                      |
| PVC 4        | 21.1                       | 617.3                      | 55.2     | 39.4                      |
| PVC 5        | 21.5                       | 649.7                      | 56.1     | 40.2                      |

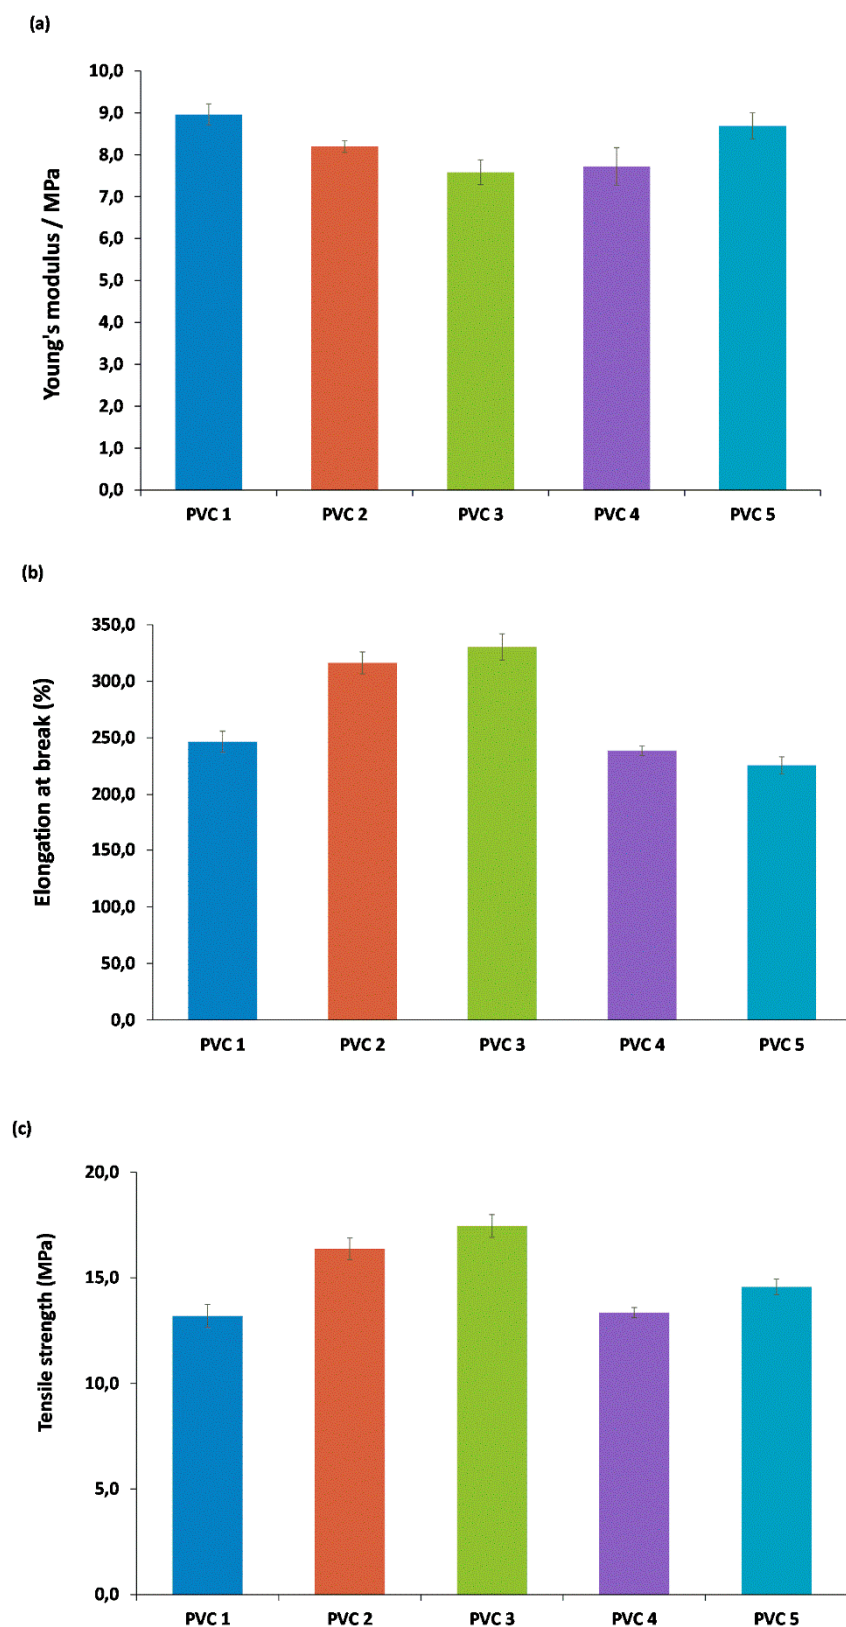

**Figure S6.** Mechanical properties of all PVC-DEHF/DEHT blends: (a) Young's modulus, (b) elongation at break and (c) tensile strength.

### 3. Thermal Properties

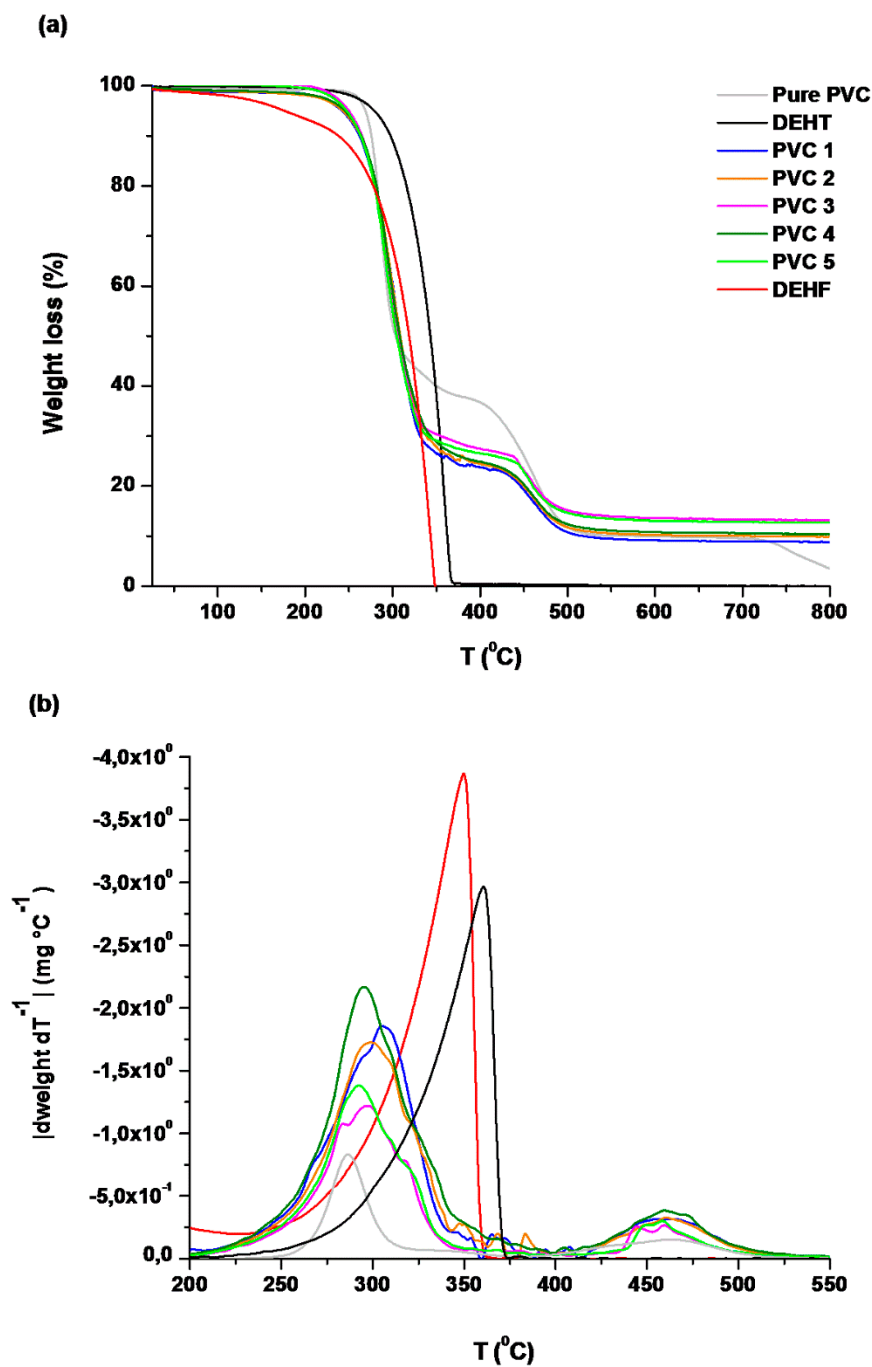

**Figure S7.** TGA (a) and DTG (b) thermograms of all PVC-DEHF/DEHT blends, related DEHF and DEHT plasticizers and pure PVC.

#### 4. Migration Resistance Tests

**Table S3.** PVC blends weight loss percentage results determined from the chemical and volatile resistance tests.

| Chemicals               | Formulations                 |       |       |       |       |
|-------------------------|------------------------------|-------|-------|-------|-------|
|                         | PVC1                         | PVC2  | PVC3  | PVC4  | PVC5  |
|                         | weight loss (%) <sup>a</sup> |       |       |       |       |
| <b>water</b>            | 0.04                         | 0.08  | 0.26  | 0.27  | 0.09  |
| <b>PBS</b>              | 0.04                         | 0.07  | 0.17  | 0.13  | 0.13  |
| <b>cyclohexane</b>      | 21.40                        | 16.93 | 19.86 | 15.19 | 12.20 |
| <b>activated carbon</b> | 0.04                         | 0.21  | 0.26  | 0.14  | 0.21  |

<sup>a</sup> Error deviations were less than or equal to 0.01%.
